# Supplementary material
Source: PubMed Central journal article supplement (PMC4246302)
Supplement: pnas.201413477SI.pdf [file pnas.201413477SI.pdf]

# Supporting Information

Kasahara et al. 10.1073/pnas.1413477111

## SI Text

### 1. Sample Growth and Characterization

High-quality single crystals of tetragonal  $\beta$ -FeSe were grown by the vapor transport method at Karlsruhe Institute of Technology. (1). A mixture of Fe and Se powders was sealed in an evacuated  $\text{SiO}_2$  ampoule together with KCl and  $\text{AlCl}_3$  powders. The ampoule was heated to 390 °C on one end while the other end was kept at 240 °C. After 28.5 d, single crystals of FeSe with tetragonal morphology were extracted at the cold end. We note that the crystals grow directly in the tetragonal phase at these temperatures, resulting in high-quality single crystals free from structural transformations or decomposition reactions. Wavelength-dispersive X-ray spectroscopy reveals an impurity level below 500 ppm. In particular, there is no evidence of Cl, Si, K, or Al impurities. X-ray diffraction confirms the tetragonal structure with lattice constants  $a = 3.7707(12)$  Å and  $c = 5.521(3)$  Å. Structural refinement shows the stoichiometric composition of Fe and Se within the error [Fe:Se = 0.995(4):1]. The structural  $z$  parameter of Se is  $z_{\text{Se}} = 0.26668(9)$ . No indications for interstitial atoms were found.

The extremely small level of impurities and defects (less than one impurity per 2,000 Fe atoms) are confirmed by scanning tunneling microscope (STM) topography (Fig. S1).

Fig. S2B shows the magnetic susceptibility  $\chi$  of the sample used for the penetration depth measurements (Fig. 1B), which is measured by superconducting quantum interference device magnetometer under zero-field cooling condition with a field applied parallel to the  $c$  axis ( $H = 1$  Oe). The sample size is approximately  $300 \times 300 \times 10$   $\mu\text{m}^3$ . The susceptibility shows sharp transition with the width (10–90%) of 0.3 K and  $T_c$  defined as the midpoint of the transition as 9.25 K. Fig. S2A shows the resistive transition of another sample of the same batch (Fig. 1A, *Inset*). The temperature at which the resistivity goes to zero is 9.40 K, which is very close to  $T_c$  determined by  $\chi$ .

The high quality of our samples allows quantum oscillations above  $H_{\text{irr}}$  to be observed (2). The results, together with large  $RRR$  value (Fig. 1A), large magnetoresistance (Fig. 1A, *Inset*), and extremely small level of impurities and defects (Fig. S1), demonstrate that the crystals used in the present study are very clean.

### 2. Transport Measurements

Thermal conductivity and magnetoresistance were measured on the same crystal ( $880 \times 340 \times 10$   $\mu\text{m}^3$ ) using the same contacts. We attached the contacts after cleaving the surface. The thermal conductivity was measured by the standard steady-state method in a dilution refrigerator. Hall and Seebeck measurements were performed on another crystal ( $850 \times 1000 \times 5$   $\mu\text{m}^3$ ).

Above 10 K, the magnetoresistance  $\Delta\rho/\rho \equiv (\rho(H) - \rho)/\rho$  exhibits an  $H^n$  ( $n \sim 2$ ) dependence without saturation (Fig. S3A), which demonstrates the nearly perfect compensation, i.e., an equal density of electrons and holes,  $n_h = n_e$ . In a compensated metal, the magnetoresistance is given by  $\Delta\rho/\rho = (\omega_c^e \tau_e)(\omega_c^h \tau_h)$ , where  $\omega_c = e\mu H/m$  is the cyclotron frequency for carriers with mass  $m$  and scattering time  $\tau$  (3). The suffixes e and h denote “electron” and “hole,” respectively. At  $T = 10$  K we estimate  $(\omega_c^e \tau_e)(\omega_c^h \tau_h) \approx 5$  at 10 T, indicating the high mobility of charge carriers.

Fig. S3B shows the temperature dependence of the Hall coefficient  $R_h$  in the zero-field limit. Above 100 K,  $R_h$  is close to zero. Below  $\sim 60$  K,  $R_h$  is negative and strongly temperature dependent. In a compensated metal, the Hall coefficient is given by  $R_h = 1/n_e e((\omega_c^e \tau_e - \omega_c^h \tau_h)/(\omega_c^e \tau_e + \omega_c^h \tau_h))$  (3). The strong  $T$  de-

pendence of  $R_h$  indicates that the electron and hole mobilities are of the same order (4), which is consistent with the QPI results.

Fig. S3C shows the temperature dependence of the Seebeck coefficient divided by  $T$ ,  $S/T$ . Below 40 K,  $S$  is negative. The Seebeck coefficient in the single-band case is expected to be  $T$ -linear in the zero-temperature limit and linked to  $\varepsilon_F$  by  $S/T = \pm (\pi^2/2)(k_B^2/e)(1/\varepsilon_F)$ . In a multiband system with both electrons and holes contributing with opposite signs to the overall Seebeck response, the single-band formula sets an upper limit to the Fermi energy of the dominant band (5). From  $S/T \sim 3.5$   $\mu\text{V}/\text{K}^2$  at low temperatures above  $T_c$ , we estimate the upper limit of  $\varepsilon_F^e$  to be  $\sim 10$  meV.

### 3. London Penetration Depth

To determine the absolute value of the in-plane London penetration depth  $\lambda_L(0)$  in a small single crystal reliably, we combined the high-precision tunnel diode oscillator (TDO) (resonant frequency of  $f = 13$  MHz) and the microwave cavity perturbation ( $f = 28$  GHz) techniques (6).

For the TDO technique, we can determine the change of the London penetration depth  $\delta\lambda_L \equiv \lambda_L(T) - \lambda_L(0)$  by the change of the resonant frequency  $\delta f \equiv f(T) - f(0)$ ,  $\delta f = G\delta\lambda_L$ . The calibration factor  $G$  is determined from the geometry of the sample. We measured  $\delta f$  down to 100 mK.

For the microwave cavity perturbation technique, we used a superconducting cavity resonator with high  $Q$  factor ( $Q > 10^6$ ). We measured the microwave surface impedance  $Z_s = R_s + iX_s$  in the Meissner state down to 4.2 K, where  $R_s$  and  $X_s$  are the surface resistance and reactance, respectively (Fig. S4A). In the present frequency range, the complex conductivity  $\sigma = \sigma_1 - i\sigma_2$  in the skin-depth regime is given by  $Z_s$  through the relation

$$Z_s = R_s + iX_s = \left( \frac{i\mu_0\omega}{\sigma_1 - i\sigma_2} \right)^{1/2}. \quad [\text{S1}]$$

In the Hagen–Rubens limit,  $\omega\tau \ll 1$ , where  $\omega$  is the microwave frequency and  $\tau$  is the scattering rate,  $\sigma_2$  is related to  $\lambda_L$  by  $\sigma_2 = 1/\mu_0\omega\lambda_L^2$ . In Fig. S4B, the blue circles show  $\sigma_2(T)/\sigma_2(4.2 \text{ K})$ , which represent the normalized superfluid density  $\rho_s$ . The solid lines represent  $\rho_s$  obtained from  $\delta\lambda_L(T)$  assuming several different  $\lambda_L(0)$  values. The best fit is obtained for  $\lambda_L(0) \approx 400$  nm.

### 4. Quasiparticle Interference

Fig. S5 A–L shows the energy-dependent QPI patterns at 12 T. Fig. S5 A–C displays the normalized conductance images of occupied states. To avoid the so-called set-point effect associated with the spatial variation of the integrated density of states (7), raw conductance data  $dI/dV$  are normalized by  $I/V$ , where  $I$  and  $V$  are tunneling current and bias voltage, respectively (8). The nearest-neighbor Fe–Fe distance is larger along the  $b$  axis than along the  $a$  axis. Fig. S5 D–F displays Fourier-transformed images of Fig. S5 A–C. Fig. S5 G–I displays the normalized conductance images of unoccupied states. Fig. S5 J–L displays Fourier-transformed images of Fig. S5 G–I.

Fig. S6A shows STM topographic image of the dumbbell-shaped impurity. Fig. S6B shows scanning tunneling spectroscopy (STS) spectra at the impurity (blue) and at the position far from the impurity (red). A sharp peak at +10 meV in the STS spectrum (blue) arises from the impurity bound state, which gives rise to the  $q$ -independent dispersion shown in Fig. 2 B–E.

## 5. Magnetic Torque

The magnetic torque was measured using a piezoresistive microcantilever technique down to 30 mK and up to 17.8 T. A small single crystal of approximately  $100 \times 100 \times 15 \text{ }\mu\text{m}^3$  was mounted on the lever with a tiny amount of Apiezon grease. The field is slightly tilted away from the  $c$  axis. Fig. S7 shows the field dependence of the torque signal. The irreversibility field  $H_{\text{irr}}$  is defined by the point where the hysteresis loop has closed to

a level of 0.3% (arrows pointing down). We note that  $H_{\text{irr}}$  determined by the magnetic torque coincides well with the  $H_{\text{irr}}$  defined by the zero resistivity as shown in Fig. 4 in the main text. A broad peak effect associated with the order–disorder transition of the flux-line lattice is observed after subtraction of a smooth background (arrows pointing up indicate the maximum). The peak field is seen to be strongly temperature dependent, in contrast with the  $H^*$  line.

1. Böhmer AE, et al. (2013) Lack of coupling between superconductivity and orthorhombic distortion in stoichiometric single-crystalline FeSe. *Phys Rev B* 87(18):180505(R).
2. Terashima T, et al. (2014) Anomalous Fermi surface in FeSe seen by Shubnikov-de Haas oscillation measurements. *Phys Rev B* 90(14):144517.
3. Pippard AB (1989) *Magnetoconductance in Metals* (Cambridge Univ Press, Cambridge, UK).
4. Kasahara Y, et al. (2007) Exotic superconducting properties in the electron-hole-compensated heavy-fermion "Semimetal"  $\text{URu}_2\text{Si}_2$ . *Phys Rev Lett* 99(11):116402.
5. Pourret A, et al. (2011) Strong correlation and low carrier density in  $\text{Fe}_{1+y}\text{Te}_{0.6}\text{Se}_{0.4}$  as seen from its thermoelectric response. *Phys Rev B* 83(2):020504(R).
6. Hashimoto K, et al. (2012) A sharp peak of the zero-temperature penetration depth at optimal composition in  $\text{BaFe}_2(\text{As}_{1-x}\text{P}_x)_2$ . *Science* 336(6088):1554–1557.
7. Chen CJ (2008) *Introduction to Scanning Tunneling Microscopy* (Oxford Univ Press, Oxford).
8. Feenstra RM, Stroscio JA, Fein AP (1987) Tunneling spectroscopy of the  $\text{Si}(111)2 \times 1$  surface. *Surf Sci* 181(1-2):295–306.

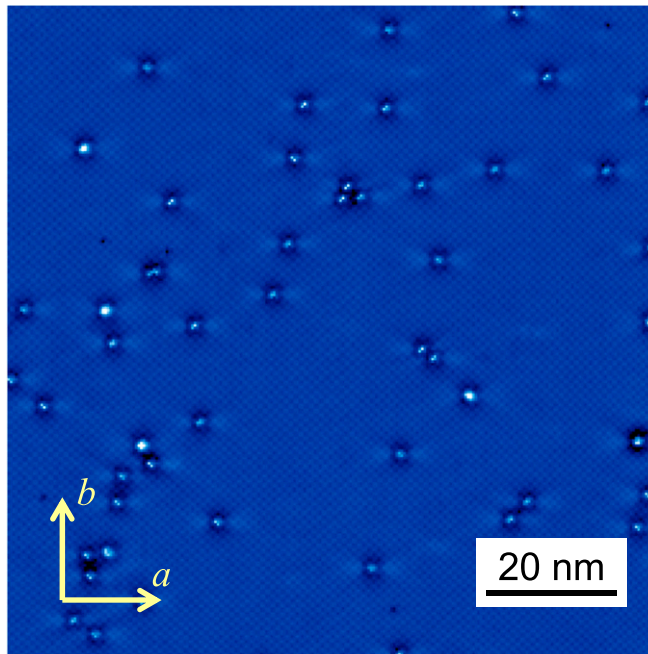

**Fig. S1.** STM topograph of FeSe at 1.5 K. White bright spots are impurities or defects. Feedback conditions are sample bias voltage  $V_s = +95 \text{ mV}$  and tunneling current  $I_t = 10 \text{ pA}$ .





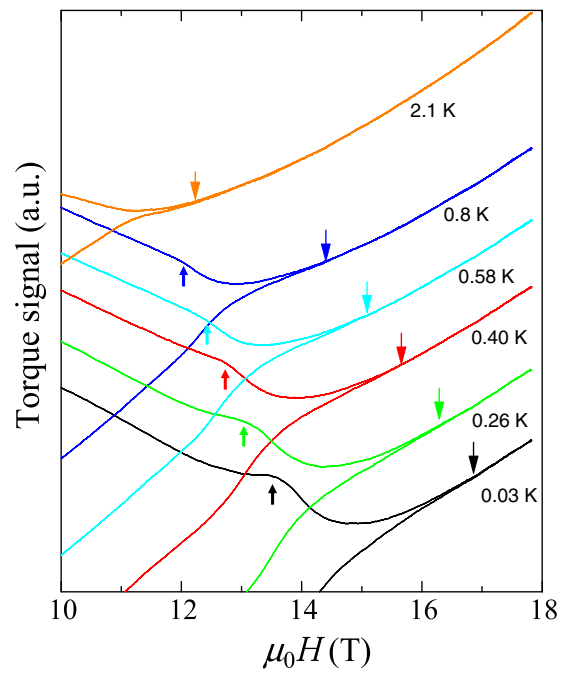

**Fig. S7.** Field dependence of the magnetic torque at low temperatures. Each curve is vertically shifted for clarity. Downward (upward) arrows mark the positions of the irreversibility (peak) field.
